# Supplementary material
Source: MDPI journal article supplement (https://www.mdpi.com/1999-4907/15/3/545)
Supplement: s1 [file s1]

# **Supplementary Materials: Questionnaire**

Contains the Swedish version that was used in the study as well as an English translation of it.

## Företaget

1. Hur stor andel av de som arbetar i företaget arbetar med skogliga tjänster? Om ingen arbetar skogligt, behöver inte resterande del av enkäten besvaras men vi tar gärna emot ditt svar. Sätt kryss i en ruta.

|                          |                          |                          |                          |                          |
|--------------------------|--------------------------|--------------------------|--------------------------|--------------------------|
| 0%                       | 1-25%                    | 26-50%                   | 51-75%                   | Mer än 75%               |
| <input type="checkbox"/> |

2. Hur många arbetar i företaget i respektive anställningsform? Inkluderar även ägare som arbetar aktivt i företaget. Skriv en siffra på linjen.

|                |       |          |
|----------------|-------|----------|
| Heltid         | ..... | personer |
| Deltid         | ..... | personer |
| Säsong         | ..... | personer |
| Timanställning | ..... | personer |

3. Ange hur mycket respektive typ av tjänst utgör av ert företags verksamhet, mätt som en andel av den totala omsättningen. Kryssa i en ruta i varje rad.

|                               | 0%                       | 1-25%                    | 26-50%                   | 51-75%                   | Mer än 75%               |
|-------------------------------|--------------------------|--------------------------|--------------------------|--------------------------|--------------------------|
| Drivning                      | <input type="checkbox"/> |
| Skogsvård                     | <input type="checkbox"/> |
| Annan skoglig verksamhet      | <input type="checkbox"/> |
| Annan icke skoglig verksamhet | <input type="checkbox"/> |

4. I vilken av följande regioner är företaget främst aktivt? Kryssa i en ruta.

|                          |                          |                          |                          |
|--------------------------|--------------------------|--------------------------|--------------------------|
| Norra Norrland           | Södra Norrland           | Svealand                 | Götaland                 |
| <input type="checkbox"/> | <input type="checkbox"/> | <input type="checkbox"/> | <input type="checkbox"/> |

5. Ungefär hur mycket omsatte företaget under förra året? Kryssa i ditt svar i en ruta.

|                          |                          |                          |                          |
|--------------------------|--------------------------|--------------------------|--------------------------|
| Under 1,5 miljoner kr    | 1,5-4 miljoner kr        | 4,1-8 miljoner kr        | Över 8 miljoner kr       |
| <input type="checkbox"/> | <input type="checkbox"/> | <input type="checkbox"/> | <input type="checkbox"/> |

6. Hur uppfattar du företagets ekonomiska situation? Kryssa i ditt svar i en ruta.

|                          |                          |                          |                          |                          |
|--------------------------|--------------------------|--------------------------|--------------------------|--------------------------|
| Mycket dåligt            | Ganska dåligt            | Varken eller             | Ganska bra               | Mycket bra               |
| <input type="checkbox"/> |

7. Hur anser du att arbetsmiljöarbete påverkar företaget ekonomiskt? Ringa in ditt svar på skalan.

|                 |   |   |   |   |   |                 |
|-----------------|---|---|---|---|---|-----------------|
| Enbart negativt |   |   |   |   |   | Enbart positivt |
| 1               | 2 | 3 | 4 | 5 | 6 | 7               |

## Ensamarbete

8. Finns skriftliga rutiner tillgängliga för hur och när ensamarbete får genomföras? Kryssa i ditt svar i en ruta

|                          |                          |                          |                          |
|--------------------------|--------------------------|--------------------------|--------------------------|
| Ja                       | Ja, till viss del        | Nej                      | Vet ej                   |
| <input type="checkbox"/> | <input type="checkbox"/> | <input type="checkbox"/> | <input type="checkbox"/> |

9. Hur frekvent kontrollerar en kollega eller arbetsledare att personalen kommit hem efter avslutat ensamarbete? Ringa in ditt svar på skalan.

|        |   |   |   |   |   |        |                                           |
|--------|---|---|---|---|---|--------|-------------------------------------------|
| Aldrig |   |   |   |   |   | Alltid | Ensamarbete<br>förekommer<br>inte hos oss |
| 1      | 2 | 3 | 4 | 5 | 6 | 7      | <input type="checkbox"/>                  |

## Skyddsron

10. Har skyddsron utförts på respektive arbetsplats under det senaste året? Kryssa i ditt svar i en ruta.

|                          |                                |                                     |                          |
|--------------------------|--------------------------------|-------------------------------------|--------------------------|
| Nej                      | Ja, en gång per<br>arbetsplats | Ja, flera gånger per<br>arbetsplats | Vet ej                   |
| <input type="checkbox"/> | <input type="checkbox"/>       | <input type="checkbox"/>            | <input type="checkbox"/> |

11. Finns en skriftlig handlingsplan för arbetsmiljöarbete som är gjord eller uppdaterad under det senaste året? Kryssa i ditt svar i en ruta.

|                          |                           |                                |
|--------------------------|---------------------------|--------------------------------|
| Ja                       | Nej, men en äldre än 1 år | Nej, ingen handlingsplan finns |
| <input type="checkbox"/> | <input type="checkbox"/>  | <input type="checkbox"/>       |

12. Finns skyddsombud utsett bland personalen? Kryssa i ett svar i rutan.

|                          |                          |                          |                              |                          |
|--------------------------|--------------------------|--------------------------|------------------------------|--------------------------|
| Nej                      | Ja, ett                  | Ja, flera                | Ja, regionalt<br>skyddsombud | Vet ej                   |
| <input type="checkbox"/> | <input type="checkbox"/> | <input type="checkbox"/> | <input type="checkbox"/>     | <input type="checkbox"/> |

## Instruktioner

13. Finns skriftliga instruktioner tillgängliga för riskfyllda arbetsuppgifter? Kryssa i en ruta.

|                          |                            |                                |                           |                          |                                     |
|--------------------------|----------------------------|--------------------------------|---------------------------|--------------------------|-------------------------------------|
| Nej                      | Ja, för vissa<br>uppgifter | Ja, för de flesta<br>uppgifter | Ja, för alla<br>uppgifter | Vet ej                   | Inga riskfyllda<br>uppgifter utförs |
| <input type="checkbox"/> | <input type="checkbox"/>   | <input type="checkbox"/>       | <input type="checkbox"/>  | <input type="checkbox"/> | <input type="checkbox"/>            |

14. Om instruktioner för riskfyllda arbetsuppgifter finns tillgängliga, hur frekvent informeras personalen om dessa instruktioner? Ringa in ditt svar på skalan.

|        |   |   |   |   |   |             |
|--------|---|---|---|---|---|-------------|
| Aldrig |   |   |   |   |   | Mycket ofta |
| 1      | 2 | 3 | 4 | 5 | 6 | 7           |

**15.** Hur ofta tilldelas personalen på arbetsplatsen platsens larmkoordinatorer? Ringa in ditt svar på skalan.

| Aldrig |   |   |   |   |   | Alltid | Vet ej                   |
|--------|---|---|---|---|---|--------|--------------------------|
| 1      | 2 | 3 | 4 | 5 | 6 | 7      | <input type="checkbox"/> |

## Kompetensutveckling

**16.** Hur ofta erbjuds personalen att delta i någon form av vidareutbildning? Kryssa i ditt svar i en ruta.

| Varje år                 | Vartannat år             | Mer sällan               | Aldrig                   |
|--------------------------|--------------------------|--------------------------|--------------------------|
| <input type="checkbox"/> | <input type="checkbox"/> | <input type="checkbox"/> | <input type="checkbox"/> |

**17.** I vilken utsträckning tillgodoses personalens önskemål om att få delta i kurser eller liknande former av kompetensutveckling? Ringa in ditt svar på skalan.

| Inte alls |   |   |   |   |   | Helt och hållet |
|-----------|---|---|---|---|---|-----------------|
| 1         | 2 | 3 | 4 | 5 | 6 | 7               |

**18.** Hur stor andel av de som arbetar i företaget har genomgått en jämställdhetsutbildning? Kryssa i ditt svar i en ruta.

| Vet ej                   | 0%                       | 1-25%                    | 26-50%                   | 51-75%                   | 76-100%                  |
|--------------------------|--------------------------|--------------------------|--------------------------|--------------------------|--------------------------|
| <input type="checkbox"/> |

## Utrustning

**19.** I hur hög utsträckning uppmuntras personalen att använda skyddsutrustning när riskfyllt arbete utförs? Ringa in ditt svar på skalan.

| Aldrig |   |   |   |   |   | Hög utsträckning | Vet ej                   |
|--------|---|---|---|---|---|------------------|--------------------------|
| 1      | 2 | 3 | 4 | 5 | 6 | 7                | <input type="checkbox"/> |

**20.** I vilken utsträckning tillhandahåller företaget personlig skyddsutrustning individuellt till varje arbetstagare? Ringa in ditt svar på skalan.

| Inte alls |   |   |   |   |   | Mycket hög utsträckning |
|-----------|---|---|---|---|---|-------------------------|
| 1         | 2 | 3 | 4 | 5 | 6 | 7                       |

**21.** Hur modern är företagets utrustning generellt sett? Detta inkluderar till exempel arbetsfordon, maskiner, sågar och liknande. Ringa in ditt svar på skalan.

| Mycket gammal |   |   |   |   |   | Mycket modern |
|---------------|---|---|---|---|---|---------------|
| 1             | 2 | 3 | 4 | 5 | 6 | 7             |

## Personalutrymmen

22. Hur ofta har personalen tillgång till ett personalutrymme (t.ex. koja) vid arbete i skogen? Ringa in ditt svar på skalan.

| Aldrig |   |   |   |   |   |   | Alltid |
|--------|---|---|---|---|---|---|--------|
| 1      | 2 | 3 | 4 | 5 | 6 | 7 |        |

23. Har personalen tillgång till följande på arbetsplatsen? Kryssa i en ruta på varje rad.

|                                                   | Finns alltid             | Finns ibland             | Finns inte               |
|---------------------------------------------------|--------------------------|--------------------------|--------------------------|
| Möjlighet att tvätta sig i varmt vatten           | <input type="checkbox"/> | <input type="checkbox"/> | <input type="checkbox"/> |
| Möjlighet att värma mat                           | <input type="checkbox"/> | <input type="checkbox"/> | <input type="checkbox"/> |
| Uppvärm utrymme för rast                          | <input type="checkbox"/> | <input type="checkbox"/> | <input type="checkbox"/> |
| Utrymme för ombyte                                | <input type="checkbox"/> | <input type="checkbox"/> | <input type="checkbox"/> |
| Möjlighet att torka kläder                        | <input type="checkbox"/> | <input type="checkbox"/> | <input type="checkbox"/> |
| Förvaringsutrymme för privata kläder och ägodelar | <input type="checkbox"/> | <input type="checkbox"/> | <input type="checkbox"/> |
| Toalett                                           | <input type="checkbox"/> | <input type="checkbox"/> | <input type="checkbox"/> |

## Olycksfall och sjukfrånvaro

24. Sett till de senaste tre åren, hur många gånger per år har olyckor inträffat under arbete? Skriv ditt svar på linjen.

.....gg/år

25. Efter att olyckor har skett, i hur hög utsträckning har företaget gjort säkerhetsmässiga åtgärder? Ringa in ditt svar på skalan.

| Aldrig |   |   |   |   |   | Varje gång |
|--------|---|---|---|---|---|------------|
| 1      | 2 | 3 | 4 | 5 | 6 | 7          |

26. Hur mycket sjukfrånvaro upplever du att företaget har? Kryssa i ditt svar i rutan.

|                          |                          |                          |                          |                          |
|--------------------------|--------------------------|--------------------------|--------------------------|--------------------------|
| Väldigt lite             | Ganska lite              | Varken eller             | Ganska mycket            | Väldigt mycket           |
| <input type="checkbox"/> |

27. Erbjuder företaget friskvårdsbidrag till personalen? Kryssa i ditt svar i en ruta.

|                          |                          |
|--------------------------|--------------------------|
| Ja                       | Nej                      |
| <input type="checkbox"/> | <input type="checkbox"/> |

## The company

1. What percentage of those who work in the company work with forestry services? If no one works in forestry, the remaining part of the questionnaire does not need to be answered, but we will be happy to receive your answer. Answer by ticking a box.

|                          |                          |                          |                          |                          |
|--------------------------|--------------------------|--------------------------|--------------------------|--------------------------|
| 0%                       | 1-25%                    | 26-50%                   | 51-75%                   | > 75%                    |
| <input type="checkbox"/> |

2. How many people work in the company in each form of employment? Also includes owners who work actively in the company. Write a number on the line.

|                                          |       |         |
|------------------------------------------|-------|---------|
| Full-time employment                     | ..... | persons |
| Part-time employment                     | ..... | persons |
| Seasonal employment                      | ..... | persons |
| Occasional employment (paid by the hour) | ..... | persons |

3. State how much each type of service makes up of your company's business, measured as a percentage of total turnover. Answer by ticking a box on each row.

|                            | 0%                       | 1-25%                    | 26-50%                   | 51-75%                   | > 75%                    |
|----------------------------|--------------------------|--------------------------|--------------------------|--------------------------|--------------------------|
| Logging                    | <input type="checkbox"/> |
| Silviculture               | <input type="checkbox"/> |
| Other forestry services    | <input type="checkbox"/> |
| Other non-forestry service | <input type="checkbox"/> |

4. In which of the following regions is the company mainly active? Answer by ticking a box.

|                          |                          |                          |                          |
|--------------------------|--------------------------|--------------------------|--------------------------|
| Northern Norrland        | Southern Norrland        | Svealand                 | Götaland                 |
| <input type="checkbox"/> | <input type="checkbox"/> | <input type="checkbox"/> | <input type="checkbox"/> |

5. Approximately how much was the company's turnover (in Swedish kronor) last year? Answer by ticking a box.

|                          |                          |                          |                          |
|--------------------------|--------------------------|--------------------------|--------------------------|
| < 1,5 million            | 1.5-4 million            | 4.1-8 million            | > 8 miljoner             |
| <input type="checkbox"/> | <input type="checkbox"/> | <input type="checkbox"/> | <input type="checkbox"/> |

6. How do you perceive the company's financial situation? Answer by ticking a box.

|                          |                          |                          |                          |                          |
|--------------------------|--------------------------|--------------------------|--------------------------|--------------------------|
| Very bad                 | Quite bad                | Neither good or bad      | Quite good               | Very good                |
| <input type="checkbox"/> |

7. In your opinion, how does work environment efforts affect the company's finances? Circle your answer on the scale.

| Only negative |   |   |   |   |   | Only positive |
|---------------|---|---|---|---|---|---------------|
| 1             | 2 | 3 | 4 | 5 | 6 | 7             |

## Unaccompanied work

8. Are written guidelines available for how and when unaccompanied work may be carried out? Answer by ticking a box.

|                          |                          |                          |                          |
|--------------------------|--------------------------|--------------------------|--------------------------|
| Yes                      | Yes, to some extent      | No                       | Do not know              |
| <input type="checkbox"/> | <input type="checkbox"/> | <input type="checkbox"/> | <input type="checkbox"/> |

9. How often does a colleague or supervisor check that the employee has returned home after finishing solo work? Circle your answer on the scale.

|       |   |   |   |   |   |   |        |                          |
|-------|---|---|---|---|---|---|--------|--------------------------|
| Never |   |   |   |   |   |   | Always | Solo work does not occur |
| <hr/> |   |   |   |   |   |   |        |                          |
| 1     | 2 | 3 | 4 | 5 | 6 | 7 |        | <input type="checkbox"/> |
| <hr/> |   |   |   |   |   |   |        |                          |

## Safety inspections

10. Have safety inspections been carried out at each workplace during the past year? Answer by ticking a box.

|                          |                          |                                  |                          |
|--------------------------|--------------------------|----------------------------------|--------------------------|
| No                       | Yes, once per work place | Yes, several times per workplace | Do not know              |
| <input type="checkbox"/> | <input type="checkbox"/> | <input type="checkbox"/>         | <input type="checkbox"/> |

11. Is there a written action plan for the work environment that was made or updated during the last year? Answer by ticking a box.

|                          |                               |                             |
|--------------------------|-------------------------------|-----------------------------|
| Yes                      | No, but one older than 1 year | No, there is no action plan |
| <input type="checkbox"/> | <input type="checkbox"/>      | <input type="checkbox"/>    |

12. Are safety representatives appointed among the staff? Answer by ticking a box.

|                          |                          |                          |                                       |                          |
|--------------------------|--------------------------|--------------------------|---------------------------------------|--------------------------|
| No                       | Yes, one                 | Yes, several             | Yes, a regional safety representative | Do not know              |
| <input type="checkbox"/> | <input type="checkbox"/> | <input type="checkbox"/> | <input type="checkbox"/>              | <input type="checkbox"/> |

## Instructions

13. Are written instructions available for hazardous work tasks? Answer by ticking a box.

|                          |                          |                          |                          |                          |                                  |
|--------------------------|--------------------------|--------------------------|--------------------------|--------------------------|----------------------------------|
| No                       | Yes, for some tasks      | Yes, for most tasks      | Yes, for all tasks       | Do not know              | No hazardous tasks are performed |
| <input type="checkbox"/>         |

14. If instructions for hazardous tasks are available, how often are staff informed of these instructions? Circle your answer on the scale.

|       |   |   |   |   |   |   |            |  |
|-------|---|---|---|---|---|---|------------|--|
| Never |   |   |   |   |   |   | Very often |  |
| <hr/> |   |   |   |   |   |   |            |  |
| 1     | 2 | 3 | 4 | 5 | 6 | 7 |            |  |
| <hr/> |   |   |   |   |   |   |            |  |

15. How often are the personnel at the workplace provided the location's alarm coordinates?  
Circle your answer on the scale.

| Never |   |   | Always |   |   | Do not know              |
|-------|---|---|--------|---|---|--------------------------|
| 1     | 2 | 3 | 4      | 5 | 6 | 7                        |
|       |   |   |        |   |   | <input type="checkbox"/> |

## Competence development

16. How often are the employees offered to participate in some form of competence development activities? Answer by ticking a box.

| Every year               | Every second year        | More rarely              | Never                    |
|--------------------------|--------------------------|--------------------------|--------------------------|
| <input type="checkbox"/> | <input type="checkbox"/> | <input type="checkbox"/> | <input type="checkbox"/> |

17. To what extent are the employees' requests to participate in courses or similar forms of competence development met? Circle your answer on the scale.

| No at all |   |   | Completely |   |   |
|-----------|---|---|------------|---|---|
| 1         | 2 | 3 | 4          | 5 | 6 |
|           |   |   |            |   | 7 |

18. What percentage of those who work in the company have completed equality training? Answer by ticking a box.

| Do not know              | 0%                       | 1-25%                    | 26-50%                   | 51-75%                   | 76-100%                  |
|--------------------------|--------------------------|--------------------------|--------------------------|--------------------------|--------------------------|
| <input type="checkbox"/> |

## Equipment

19. To what extent are the staff encouraged to use protective equipment when performing hazardous work? Circle your answer on the scale.

| Never |   |   | To a large extent |   |   | Do not know              |
|-------|---|---|-------------------|---|---|--------------------------|
| 1     | 2 | 3 | 4                 | 5 | 6 | 7                        |
|       |   |   |                   |   |   | <input type="checkbox"/> |

20. To what extent does the company provide personal protective equipment individually to each worker? Circle your answer on the scale.

| Not at all |   |   | To a very large extent |   |   |
|------------|---|---|------------------------|---|---|
| 1          | 2 | 3 | 4                      | 5 | 6 |
|            |   |   |                        |   | 7 |

21. How modern is the company's equipment in general? This includes, for example, work vehicles, machines, saws and the like. Circle your answer on the scale.

| Very old |   |   | Very modern |   |   |
|----------|---|---|-------------|---|---|
| 1        | 2 | 3 | 4           | 5 | 6 |
|          |   |   |             |   | 7 |



## Staff facilities

22. How often do the staff have access to staff facilities (e.g. a cabin/trailer) when working in the forest? Circle your answer on the scale.

| Never |   |   |   |   |   | Always |
|-------|---|---|---|---|---|--------|
| 1     | 2 | 3 | 4 | 5 | 6 | 7      |

23. Do the staff have access to the following at the workplace? Answer by ticking a box in each row.

|                                                    | Always                   | Sometimes                | Never                    |
|----------------------------------------------------|--------------------------|--------------------------|--------------------------|
| Possibility to wash in hot water                   | <input type="checkbox"/> | <input type="checkbox"/> | <input type="checkbox"/> |
| Possibility to heat food                           | <input type="checkbox"/> | <input type="checkbox"/> | <input type="checkbox"/> |
| Heated space for rest                              | <input type="checkbox"/> | <input type="checkbox"/> | <input type="checkbox"/> |
| Space for changing clothes                         | <input type="checkbox"/> | <input type="checkbox"/> | <input type="checkbox"/> |
| Possibility to dry clothes                         | <input type="checkbox"/> | <input type="checkbox"/> | <input type="checkbox"/> |
| Storage space for private clothing and possessions | <input type="checkbox"/> | <input type="checkbox"/> | <input type="checkbox"/> |
| Toilet                                             | <input type="checkbox"/> | <input type="checkbox"/> | <input type="checkbox"/> |

## Accidents

24. Looking at the last three years, how many times per year have accidents occurred at work?

.....times/year

25. After accidents have occurred, to what extent has the company taken safety measures? Circle your answer on the scale.

| Never |   |   |   |   |   | Every time |
|-------|---|---|---|---|---|------------|
| 1     | 2 | 3 | 4 | 5 | 6 | 7          |

26. How much sick leave do you think the company has? Answer by ticking a box.

| Very little              | Quite little             | Neither little or much   | Quite much               | Very much                |
|--------------------------|--------------------------|--------------------------|--------------------------|--------------------------|
| <input type="checkbox"/> |

27. Does the company offer wellness benefits to the staff? Answer by ticking a box.

| Yes                      | No                       |
|--------------------------|--------------------------|
| <input type="checkbox"/> | <input type="checkbox"/> |
